# Supplementary material for: Elastomeric Pillar Cages Modulate Actomyosin Contractility of Epithelial Microtissues by Substrate Stiffness and Topography
Source: Cells. 2023 Apr 26;12(9):1256. doi: 10.3390/cells12091256 (PMC10177551; doi:10.3390/cells12091256)
Supplement: Supplementary file 1 [file cells-12-01256-s001.zip]

Archive with 4 entries (4 files):
- cells-2334794 - Suppl.pdf
- Movie_S1.avi
- Movie_S2.avi
- Movie_S3.avi
